# Supplementary material for: ITIL: Information Technology Infrastructure Library
Source: Royal Society of Chemistry journal article supplement (doi:10.1039/d0cp03434g), 2007-01-01
Supplement: d0cp03434g1.pdf [file d0cp03434g1.pdf]

## Supplementary Information (SI) for

### Van der Waals heterostructures based on MSSe (M = Mo, W) and graphene-like GaN: Enhanced optoelectronic and photocatalytic properties for water splitting

M. Idrees<sup>1</sup>, Chuong V. Nguyen<sup>2†</sup>, H. D. Bui<sup>3</sup>, Iftikhar Ahmad<sup>4</sup>, Bin Amin<sup>5†</sup>

<sup>1</sup>Department of Physics, Hazara University, Mansehra 21300, Pakistan

<sup>2</sup>Department of Materials Science and Engineering, Le Quy Don Technical University,  
Ha Noi 100000, Viet Nam

<sup>3</sup>Institute of Research and Development, Duy Tan University, Da Nang 550000, Vietnam

<sup>4</sup>Department of Physics, University of Malakand, Chakdara, 18800, Pakistan

<sup>5</sup>Department of Physics, Abbottabad University of Science and Technology, Abbottabad 22010,  
Pakistan.

†To whom correspondence should be addressed: [chuongnguyen11@gmail.com](mailto:chuongnguyen11@gmail.com);  
[binukhn@gmail.com](mailto:binukhn@gmail.com)

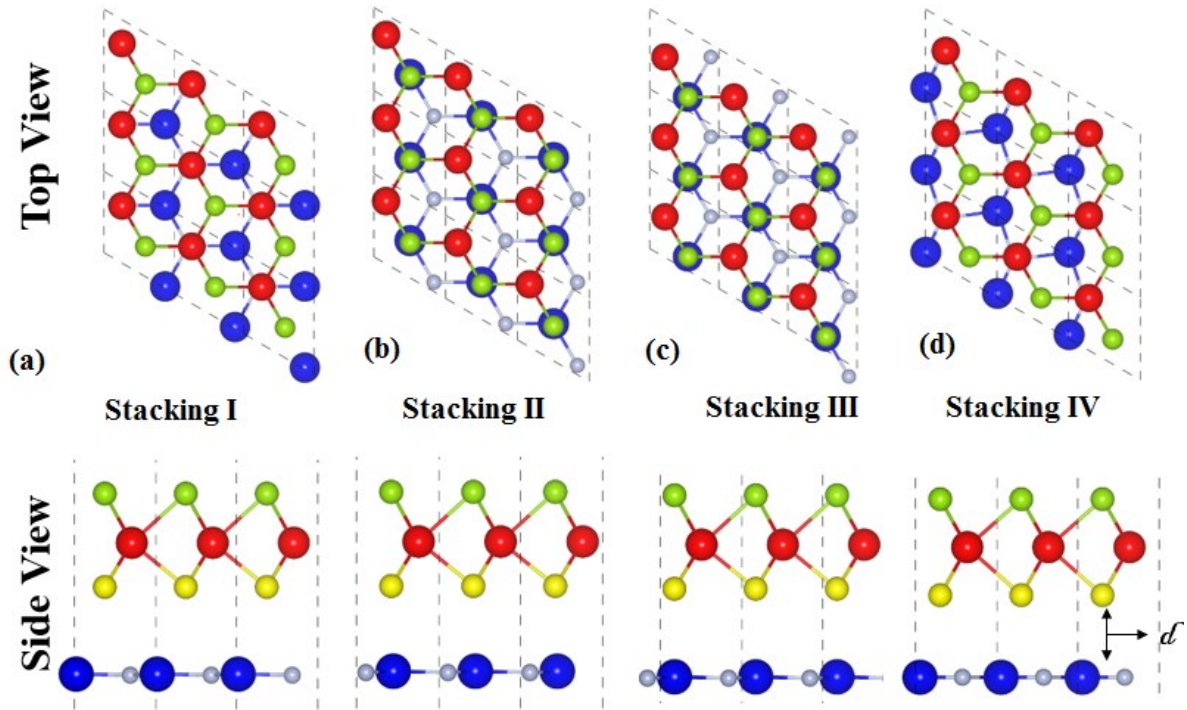

Fig. S1. The atomic structures of MSSe-g-GaN heterostructures for all stacking configurations of (a) stacking I, (b) stacking II, (c) stacking III and (d) stacking IV, respectively. The red, yellow and cyan balls stand for metal (Mo or W) and chalcogen (S or Se) atoms, respectively. The dark blue and gray balls represent the Ga and N atoms, respectively.

Tab. S1. Calculated binding energies and interlayer distance in the MSSe-g-GaN heterostructures for all stacking configurations of model I and model II.

| Configurations | Systems                | MoSSe-GaN |            | WSe-GaN   |            |
|----------------|------------------------|-----------|------------|-----------|------------|
|                |                        | (Model I) | (Model II) | (Model I) | (Model II) |
| Stacking I     | Binding energy, eV     | -0.38     | -0.32      | -0.30     | -0.23      |
|                | Interlayer distance, Å | 3.29      | 3.35       | 0.36      | 3.26       |
| Stacking II    | Binding energy, eV     | -0.35     | -0.39      | -0.26     | -0.29      |
|                | Interlayer distance, Å | 0.31      | 0.30       | 3.36      | 3.18       |
| Stacking III   | Binding energy, eV     | -0.40     | -0.35      | -0.21     | -0.26      |
|                | Interlayer distance, Å | 3.23      | 3.33       | 3.40      | 3.22       |
| Stacking IV    | Binding energy, eV     | -0.48     | -0.41      | -0.35     | -0.32      |
|                | Interlayer distance, Å | 3.0       | 3.02       | 2.95      | 3.05       |
